# Supplementary material for: Tree-rings reveal two strong solar proton events in 7176 and 5259 BCE
Source: PubMed Central journal article supplement (PMC8901681; doi:10.1038/s41467-022-28804-9), 2022-03-07
Supplement: 41467_2022_28804_MOESM1_ESM.pdf [file 41467_2022_28804_MOESM1_ESM.pdf]

## Supplementary Information

### S1 Dendrochronology

*Dendrochronological dating of waterlogged oak samples from the river Main, Germany (M49 and M234)*

The subfossil oak (*Quercus* sp.) samples, M49 and M234, used for this study were collected from waterlogged trunks discovered during gravel quarrying along the River Main in the 1970s and 1980s. Samples were obtained from a veneer mill near Bamberg, which obtained timber from a series of gravel pits along an 80 km stretch of the River Main between Schweinfurt (50.05N; 10.24E) and Lichtenfels (50.15N; 11.05E). The provenance of these particular timbers is not known exactly.

These samples were selected for inclusion in this study because the growth rings of the trees were > 1mm in width, and the samples were without distortion caused by growth anomalies or knots that would make the dissection of the single tree-rings for radiocarbon dating difficult.

The wet samples from the gravel pits were prepared using a scalpel blade to remove the rough wood from the sample surface to expose the tree-ring pattern. The ring-widths were then measured to a precision of 1/100 mm using a micro-computer based travelling stage.

The individual ring-width series for M234 was cross-dated against the Göttingen South German Oak Chronology<sup>1</sup>, and was further compared with the Hohenheim Southern German Oak chronology<sup>2</sup>, which over this time period was constructed separately from the Göttingen master chronology. The correlation values obtained are given in Table S1.1. The individual ring-width series for M49 were cross-dated against the Hohenheim Southern German Oak Chronology. The correlation values obtained are also given in Table S1.1. Figure S1.1 shows the ring-width series of M49 and M234 on a logarithmic scale against the Hohenheim master chronology.

**Table S1.1:** overlaps (years) / Gleichläufigkeit (%) / t-values (Ballie and Pilcher 1973) between M49, M234, the Göttingen South German Riverine Oak Chronology and the Hohenheim South German Oak Chronology.

|                                           | Hohenheim South German oak | M49             | M234           |
|-------------------------------------------|----------------------------|-----------------|----------------|
| Göttingen South German oak                | 8797 / 78 / 91.5           |                 |                |
| Göttingen South German oak (without M234) |                            |                 | 133 / 67 / 6.5 |
| Hohenheim Southern German oak             |                            | 118 / 69 / 10.0 | 133 / 69 / 8.5 |
| M49                                       |                            |                 | 39 / 66 / 3.0  |

The good visual matching of the ring-width series (Figure S1.1), along with the correlation values obtained (Table S1.1) dates the 118-ring series, M49, as spanning 7276–7159 BCE and the 133-ring series, M234, as spanning 7197–7065 BCE. The calendar dates provided are historic dates BCE without the year zero.

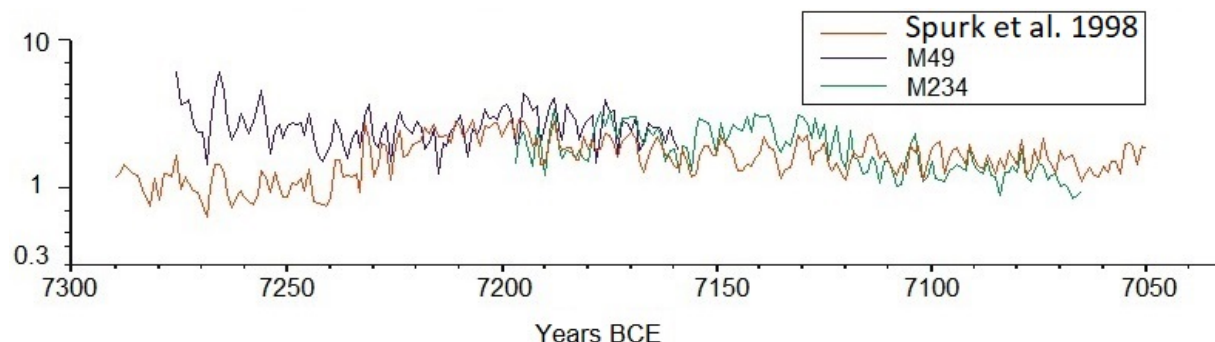

**Figure S1.1:** (a) Ring-width series of M49 and M234 on a logarithmic scale against the Hohenheim master chronology (Friedrich et al. 2004).

Timbers from the Main river gravels were originally waterlogged, but have subsequently been allowed to dry out naturally. The remaining parts of the samples are stored in the Department of Palynology and Climate Dynamics, Albrecht-von-Haller Institute for Plant Sciences, Georg-August-Universität-Göttingen, Wilhelmsplatz 1, 37073 Göttingen, Germany. Ring-width data for the two tree slices sampled for radiocarbon dating are provided in Table S1.2.

Dissection for radiocarbon dating was undertaken by Alison Arnold and Robert Howard of the Nottingham Tree-ring Dating Laboratory. The samples to be used were cleaned with a razor blade and the annual growth rings marked. At this stage it became apparent that 22 rings from the centre of M232, and two from the outside, had crumbled during storage, and only the rings spanning 7175–7067 BC were available for dissection.

The annual growth rings were split from the bulk sample using a scapel blade. Whole ring samples, including both earlywood and latewood, were provided to the ETH laboratory from M49 (7276–7160 BCE) and M232 (7175–7067 BCE). Replicate whole ring samples, including both earlywood and latewood, were provided to the Bristol laboratory from M49 (7181–7160 BCE). Further replicate whole ring samples from M49 (n=29) and M234 (n=13) have been archived by Historic England.

The annual growth rings from M49 (7178–7175 BCE) were further divided using a scapel into separate samples comprising earlywood only and latewood only, which were provided to both the ETH and Bristol laboratories.

Finally, the annual growth ring for 7177 BCE from M49 was split into early and late earlywood (EW1 and EW2), and early and late latewood (LW1 and LW2) and the samples supplied to the ETH laboratory.

**Table S1.2:** Ring-width data for the timbers which provided single-ring samples for radiocarbon calibration (Heidelberg format)

HEADER:  
KeyCode=SM001D\_0  
DataFormat=Tree  
Project=S  
Country=S  
LocationCharacteristics=M  
SiteCode=00  
TreeNo=1D  
CoreNo=0  
SeriesType=Single curve  
StatisticalDataTreatment=0  
DataType=Ringwidth  
Unit=mm  
Dated=Dated  
Length=118  
DateBegin=-7276  
DateEnd=-7159  
Species=Qusp  
Location=M49  
PersId=HL  
LastRevisionDate=01.04.90  
MissingRingsBefore=25  
DeltaMissingRingsBefore=10  
MissingRingsAfter=20

DeltaMissingRingsAfter=.  
Comment=SM000490.!OJ/\_

DATA:Single

|     |     |     |     |     |     |     |     |     |     |
|-----|-----|-----|-----|-----|-----|-----|-----|-----|-----|
| 587 | 359 | 361 | 380 | 268 | 233 | 231 | 141 | 250 | 447 |
| 586 | 438 | 272 | 203 | 234 | 306 | 271 | 225 | 275 | 353 |
| 442 | 278 | 165 | 237 | 260 | 208 | 252 | 265 | 257 | 266 |
| 221 | 309 | 213 | 160 | 146 | 162 | 184 | 279 | 243 | 190 |
| 155 | 203 | 239 | 179 | 291 | 360 | 199 | 180 | 226 | 265 |
| 148 | 249 | 316 | 268 | 241 | 226 | 275 | 250 | 176 | 195 |
| 243 | 121 | 195 | 185 | 235 | 253 | 298 | 245 | 156 | 242 |
| 224 | 245 | 333 | 283 | 293 | 281 | 336 | 359 | 315 | 189 |
| 201 | 417 | 392 | 323 | 345 | 197 | 252 | 338 | 395 | 247 |
| 206 | 353 | 311 | 279 | 207 | 254 | 277 | 304 | 143 | 223 |
| 380 | 318 | 326 | 161 | 275 | 267 | 238 | 297 | 171 | 193 |
| 270 | 248 | 247 | 240 | 197 | 251 | 196 | 171 | 0   | 0   |

HEADER:

KeyCode=SM006I\_0

DataFormat=Tree

Project=S

Country=S

LocationCharacteristics=M

SiteCode=00

TreeNo=6I

CoreNo=0

SeriesType=Single curve

StatisticalDataTreatment=0

DataType=Ringwidth

Unit=mm

Dated=Dated

Length=133

DateBegin=-7197

DateEnd=-7065

Species=Qusp

Location=M 234

PersId=HL

LastRevisionDate=01.04.90

MissingRingsBefore=0

DeltaMissingRingsBefore=0

MissingRingsAfter=0

DeltaMissingRingsAfter=0

Comment=SM002340.!OJ/ Probe fehlt

DATA:Single

|     |     |     |     |     |     |     |     |     |     |
|-----|-----|-----|-----|-----|-----|-----|-----|-----|-----|
| 144 | 207 | 230 | 177 | 135 | 250 | 202 | 119 | 231 | 331 |
| 184 | 153 | 171 | 169 | 155 | 173 | 155 | 146 | 218 | 261 |
| 315 | 254 | 313 | 244 | 208 | 285 | 283 | 295 | 293 | 224 |
| 192 | 242 | 222 | 241 | 223 | 146 | 172 | 177 | 123 | 184 |
| 182 | 128 | 241 | 288 | 275 | 267 | 206 | 168 | 268 | 196 |
| 229 | 262 | 241 | 238 | 296 | 230 | 306 | 291 | 291 | 298 |
| 242 | 190 | 167 | 201 | 187 | 239 | 302 | 294 | 269 | 208 |
| 284 | 211 | 261 | 150 | 188 | 252 | 153 | 129 | 234 | 158 |
| 149 | 121 | 125 | 157 | 145 | 105 | 146 | 145 | 119 | 99  |
| 102 | 154 | 192 | 226 | 145 | 108 | 116 | 148 | 112 | 110 |
| 106 | 126 | 129 | 141 | 132 | 126 | 183 | 139 | 126 | 121 |
| 146 | 118 | 116 | 87  | 124 | 125 | 136 | 124 | 175 | 114 |
| 108 | 127 | 144 | 135 | 111 | 117 | 120 | 100 | 101 | 97  |
| 82  | 87  | 92  | 0   | 0   | 0   | 0   | 0   | 0   | 0   |

*Dendrochronological dating of the bog oak samples from Derrymacfall, Co. Armagh, Northern Ireland (Q 2729 and Q 2750)*

In July 1977, slices were collected from seventy-one bog oak (*Quercus* sp.) timbers from the townland of Derrymacfall, just south of Lough Neagh, Co. Armagh, Northern Ireland (54° 28'N, 6° 28'W).

The wet samples were prepared using a scalpel blade to remove the rough wood from the surface of the sample and to expose the tree-ring pattern. If the wood sample was soft or the ring pattern needed to be clarified, a razor blade was used. Finely ground chalk was rubbed onto the prepared surface to define the annual tree-ring boundaries more clearly for measurement. The ring-widths were measured to a precision of 1/50mm using a travelling stage between November 1979 and September 1980. Sometimes more than one radius was measured for an individual sample (e.g. Q2737A/B), and so some ring series are a mean of two or more measurement series on the same sample.

The ring-width series of nine of these samples as well as those of two samples from Loughmagarry, Co. Antrim (Q2527 and Q2528; 54° 52'N, 6° 17'W) were included in the Derrymacfall 2 master chronology (Table S1.3). The construction of the chronology followed the procedures described by Baillie<sup>1</sup>. Samples with the best correlation values were combined to form sub-site masters. These were then used to date others samples. The other dated samples were incorporated into a new sub-site master until a coherent master chronology was formed. The individual samples were then compared with each other giving the correlation values presented in the *t*-value matrix (Table S1.4). The correlation *t*-values are based on CROS84<sup>2</sup>. At this time, the Derrymacfall 2 master chronology could not be dated by dendrochronology.

**Table S1.3:** Details of the cross-matched samples from the Derrymacfall 2 master chronology (?h/s = outermost measured ring is possible heartwood/sapwood boundary)

| Sample                         | Rings | Sapwood Rings | Absolute Dating (BCE) |
|--------------------------------|-------|---------------|-----------------------|
| <i>Derrymacfall, Co Armagh</i> |       |               |                       |
| Q2682                          | 159   | No sapwood    | BCE 5429 – 5271       |
| Q2717                          | 160   | No sapwood    | BCE 5446 – 5287       |
| Q2720                          | 100   | No sapwood    | BCE 5353 – 5254       |
| Q2729                          | 181   | 24            | BCE 5356 – 5176       |
| Q2734                          | 91    | No sapwood    | BCE 5318 – 5228       |
| Q2737M                         | 176   | No sapwood    | BCE 5457 – 5282       |
| Q2750                          | 267   | ?h/s          | BCE 5428 – 5162       |
| Q2779                          | 190   | No sapwood    | BCE 5389 – 5200       |
| Q2781                          | 139   | No sapwood    | BCE 5419 – 5281       |
| <i>Loughmagarry, Co Antrim</i> |       |               |                       |
| Q2527                          | 104   | No sapwood    | BCE 5378 – 5275       |
| Q2528                          | 133   | No sapwood    | BCE 5392 – 5260       |

In 1989 re-measurement of bog oak samples from a number of sites was undertaken. This work produced local site chronologies which cross-dated both with the Derrymacfall 2 master chronology and with the original Belfast Long Chronology (BLC5000). When the Derrymacfall 2 master chronology was compared with these chronologies extremely significant and consistent correlation values were found with the Tullyroan 10 and the Motorway 2 chronology.

**Table S1.4:** *t*-value matrix for ring-width series in the Derrymacfall 2 master chronology (- = no correlation value; nsm = non-significant match; nh = not highest match; \* = significant match; \*\* = very significant match; \*\*\* = extremely significant match)

| QUB ID     | Q2717  | Q2682       | Q2750       | Q2781       | Q2528       | Q2779       | Q2527       | Q2729       | Q2720       | Q2734       |
|------------|--------|-------------|-------------|-------------|-------------|-------------|-------------|-------------|-------------|-------------|
| Q2737<br>M | 2.33nh | 6.59***     | 2.87nh      | 3.55ns<br>m | 2.96nm      | 5.32**<br>* | 2.82nh      | 3.47nsm     | 4.02ns<br>m | -           |
| Q2717      | -      | 4.18ns<br>m | 3.67ns<br>m | 3.40ns<br>m | 1.86nh      | 6.41**<br>* | 0.38nm      | 3.33nsm     | 5.38***     | -           |
| Q2682      | -      | -           | 5.46***     | 6.94***     | 2.62nh      | 7.08**<br>* | 1.60nh      | 3.05nsm     | 5.09***     | -           |
| Q2750      | -      | -           | -           | 3.97ns<br>m | 4.51ns<br>m | 5.66**<br>* | 3.04nh      | 5.87***     | 7.44***     | 3.80ns<br>m |
| Q2781      | -      | -           | -           | -           | 3.55ns<br>m | 6.51**<br>* | 3.20ns<br>m | 2.48nh      | 4.28*       | -           |
| Q2528      | -      | -           | -           | -           | -           | 3.92*       | 7.31***     | 2.97vw<br>m | 2.45nh      | -           |
| Q2779      | -      | -           | -           | -           | -           | -           | 2.49nh      | 3.58nsm     | 6.88***     | 2.81nh      |
| Q2527      | -      | -           | -           | -           | -           | -           | -           | 2.68nh      | 1.29nh      | -           |
| Q2729      | -      | -           | -           | -           | -           | -           | -           | -           | 4.24*       | 2.98ns<br>m |
| Q2720      | -      | -           | -           | -           | -           | -           | -           | -           | -           | 3.29ns<br>m |

The Derrymacfall 2 master chronology consists of eleven samples (Figure S1.2). It is 296 years in length and dates from BCE 5457 to BCE 5162. Table S1.5 gives the correlation values of this master chronology with other site chronologies from Ireland. Only correlation values over  $t = 4$  are included in the table. The correlation  $t$ -values are based on CROS84<sup>2</sup>.

**Table S1.5:** Correlation values for the 296-year Derrymacfall 2 master chronology with other site and regional chronologies (\*\*\* = extremely significant match ; \*\* = very significant match)

| Site chronology         | Start and end date of chronology | Correlation value with Derrymacfall 2 |
|-------------------------|----------------------------------|---------------------------------------|
| Tullyroan 10, Co Armagh | 5334BCE to 4680BCE               | $t = 8.39***$                         |
| Motorway 2, Co Armagh   | 5474BCE to 5228BCE               | $t = 5.75***$                         |
| Killyleagh 1, Co Down   | 5236BCE to 4829BCE               | $t = 4.62**$                          |

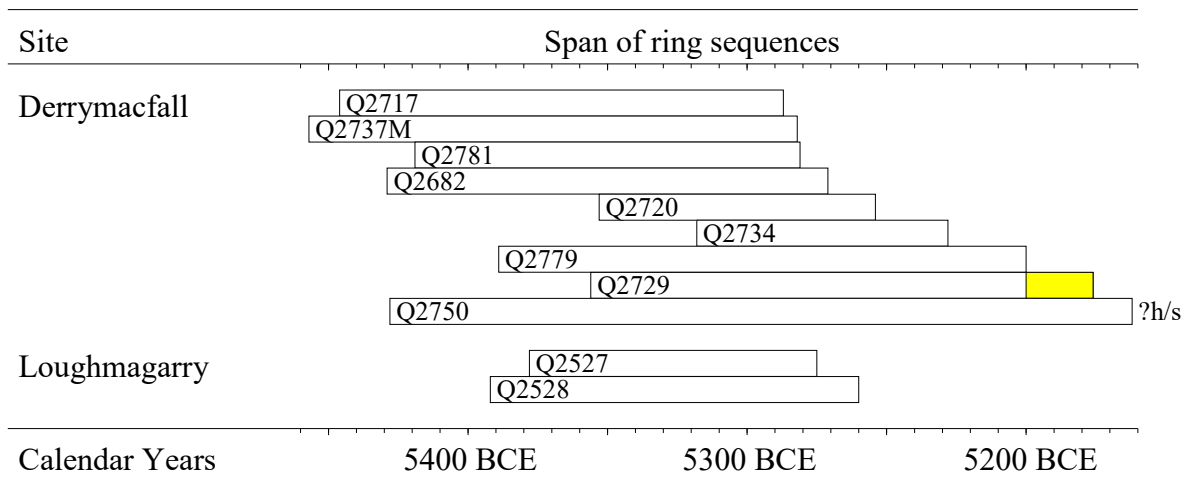

**Figure S1.2:** Bar diagram showing the relative positions of the dated samples. White bar = heartwood; yellow bar = sapwood; ?h/s = outermost measured ring is possible heartwood/sapwood boundary

Timbers from Derrymacfall were originally waterlogged, but subsequently have been allowed to dry out naturally. The remainder of the samples are stored in the Dendrochronology Laboratory, School of Natural and Built Environment, Queen’s University, Belfast. Ring-width data for all the measured samples from Derrymacfall can be found at [http://www.chrono.qub.ac.uk/bennett/dendro\\_data/dendro.html](http://www.chrono.qub.ac.uk/bennett/dendro_data/dendro.html).

Two samples from the Derrymacfall 2 site chronology, Q2729 and Q2750 (Table S1.6), have been used to supply single-year samples for radiocarbon calibration. For the selected period, the trees with the widest annual growth rings were chosen, so that extracting the individual annual growth rings is as easy as possible. The samples to be used were cleaned with a razor blade and the annual growth rings marked. The annual growth rings were split from the bulk sample using a scalpel bade and the early wood growth was removed using a scalpel. This processing means that the wood samples provided only have the latewood part of the annual growth ring.

Sample Q2729 was used to supply samples from 5300 BCE to 5211 BCE inclusive, and sample Q2750 was used to supply samples from 5210 BCE to 5175 BCE inclusive. Those single-ring samples that weighed more than 120mg were divided further using a scalpel to supply duplicate samples of 90 single rings for inter-laboratory replication.

**Table S1.6:** Ring-width data for the timbers which provided single-ring samples for radiocarbon calibration (Heidelberg format)

HEADER:

Key Code = Q2729

Data Format = Tree

Location = Derrymacfall, Co. Armagh

Length = 181

Date Begin = 5356BC

Date End = 5176BC

Dated = Dated

Comment = EDH 17-June-1980 Close to centre 24 sapwood rings not complete

Key No = Q2729

Project = Derrymacfall, Co. Armagh

Species = QUSP  
Tree No = Q2729  
Pith = -  
WaldKante = ---  
Sapwood Rings = 24  
Unit = 1/50 mm  
Data Type = Ring width  
Series Type = Single curve  
Series Start = Ring width  
Series End = Ring width  
Global Math Comment Count = 0  
Image Count = 0  
Comment Count = 0  
Bibliography Count = 0  
DATA: Single

56 46 56 76 66 84 104 75 77 73  
41 51 66 73 78 76 96 91 78 78  
100 71 73 59 58 62 53 43 84 71  
75 95 74 139 126 144 131 140 108 88  
75 85 53 36 42 47 73 73 67 70  
110 132 212 158 177 126 107 113 85 99  
80 98 106 90 92 92 97 103 150 157  
113 130 127 81 85 96 95 94 82 100  
79 94 81 99 105 126 118 106 94 67  
65 49 63 48 61 52 44 43 64 55  
63 51 69 58 58 62 63 61 61 63  
68 91 65 60 65 75 54 53 53 53  
43 44 32 30 29 27 36 29 29 34  
39 98 61 72 28 26 26 31 39 34  
46 45 64 69 49 51 55 46 35 30  
29 25 29 29 30 46 45 34 44 31  
36 31 37 33 31 38 37 36 23 28  
30 31 34 60 74 60 43 28 31 34  
19

HEADER:

Key Code = Q2750  
Data Format = Tree  
Location = Derrymacfall, Co. Armagh  
Length = 267  
Date Begin = 5428BC  
Date End = 5162BC  
Dated = Dated  
Comment = EDH 9-Aug-1980 Close to centre no sapwood possible H/S boundary  
Key No = Q2750  
Project = Derrymacfall, Co. Armagh  
Species = QUSP  
Tree No = Q2750  
Pith = -  
WaldKante = ---  
Unit = 1/50 mm  
Data Type = Ring width  
Series Type = Single curve  
Series Start = Ring width  
Series End = Ring width  
Global Math Comment Count = 0  
Image Count = 0  
Comment Count = 0

Bibliography Count = 0  
DATA: Single

15 16 17 5 14 4 19 15 12 11  
11 9 19 21 25 22 14 7 26 16  
8 21 33 40 73 48 32 23 17 26  
23 50 69 76 28 35 48 49 44 57  
37 28 23 85 95 43 48 49 77 84  
127 164 157 105 97 66 67 86 101 87  
41 25 31 42 21 13 17 13 25 19  
16 13 17 19 18 22 17 33 40 38  
33 16 8 13 12 18 16 25 40 42  
18 25 24 11 10 8 12 11 7 9  
16 15 17 13 11 16 18 19 19 32  
28 31 33 37 19 10 12 15 30 29  
28 33 40 47 30 38 59 51 28 25  
18 18 19 29 59 22 16 23 28 39  
66 45 25 23 26 46 39 44 80 66  
40 62 64 48 44 50 43 21 25 18  
21 29 37 27 55 32 45 41 32 24  
60 102 84 42 57 41 29 33 46 37  
28 46 27 26 30 34 20 45 30 31  
27 22 15 36 32 33 29 40 60 14  
21 24 56 50 35 26 17 12 6 13  
11 9 7 9 17 15 25 31 23 20  
21 24 30 47 33 35 34 60 47 40  
27 28 18 22 48 62 79 60 58 51  
29 46 37 56 48 46 52 59 49 16  
23 26 19 13 23 29 22 28 12 18  
13 21 28 38 44 47 33

### *Bristlecone Pine*

Two bristlecone pine (*Pinus Longaeva* D.K. Bailey) samples were used in this study. For the 5259 BCE event, sample MWK80-101 was selected from the calendar dated master Methuseloh Walk bristlecone pine chronology<sup>3</sup>. The sample derives from a single *Pinus longaeva* D.K.Bailey tree which grew at the Methuseloh Walk site (MWK) in the White Mountains of California in the western USA. The remnant tree was preserved in a dry, high altitude (c.2900 m a.s.l.) mountain environment. The full tree sampled had 747 rings with no pith, bark or waney edge present. Standard convention for bristlecone dating is via the use of the astronomical calendar (AD/BC with 0) for which details are provided in Ferguson *et al.*<sup>3</sup>. Chronologies are constructed using a combination of graphical skeleton plotting<sup>4</sup>, and / or tree-ring measurement, and then statistical verification using COFECHA<sup>5</sup>. For MWK80-101, calendar dates were assigned relative to the master MWK chronology and the sample was lagged successively by 25 years using COFECHA12K version 6.06P. The sample spans -5821 to -5075 (747 years, 30 50-yr segments, 0 flags and demonstrates excellent correlation with the master MWK chronology;  $r = 0.770$ ). The COFECHA outputs are provided below in AD/BC with 0. Two sub-samples of MWK80-101 were marked with dated years and sampled from the cross-dated main sample. The sub-samples were cut to be c. 5 mm thick relative to the transverse section. The upper and lower surface were lightly sanded (preserving original pin-holes) but removing any surface contamination and excess resins which come up to the sample surface over time. The upper, lower and radial surfaces were clearly marked with the pin-holes and measurements re-checked prior to dissection. Dissection was carried out using the astronomical calendar (AD/BC with 0) under times 20 magnification using a binocular microscope and steel dissecting blade. The same blade was used to remove any residual contamination possibilities (pinholes, any residual cells from the previously dissected year of interest) prior to sampling each separate year of interest. Samples were dissected





48 71-059 -5922-5302 .76 .82 .84 .87 .73 .55 .60 .79 .90 .79 .69 .61 .70 .37 .44  
 49 71-060 -5880-5324 .62 .50 .62 .55 .41 .59 .43 .53 .71 .70 .58 .63 .83 .63 .62  
 50 71-061 -5419-4931 .81 .80 .82 .80 .75 .86 .90 .85 .88  
 53 71-161 -5340-4819 .59 .64 .77 .85 .73 .69  
 55 72-104 -5722-4960 .69 .74 .79 .78 .67 .65 .53 .63 .81 .70 .58 .77 .87 .57 .67 .85 .86 .78 .62 .67  
 56 72-175 -6059-5080 .58 .68 .76 .84 .74 .68 .80 .85 .86 .79 .79 .85 .84 .69 .75 .79 .86 .89 .82 .82  
 61 77-104 -5747-4487 .68 .78 .84 .87 .82 .67 .53 .63 .76 .74 .66 .74 .82 .64 .74 .85 .86 .89 .77 .73  
 72 77-151 -5230-4748 .67 .74  
 76 77-162 -5673-4821 .70 .82 .86 .80 .77 .77 .79 .80 .76 .79 .80 .84 .84 .91 .93 .88 .85 .79 .78  
 83 78-026 -6065-5445 .75 .57 .72 .90 .67 .63 .70 .72 .84 .81  
 89 78-075 -5598-4575 .73 .66 .70 .73 .80 .74 .66 .65 .80 .81 .84 .84 .70 .74 .81 .81  
 92 79-026 -6166-5458 .70 .64 .84 .84 .76 .57 .56 .68 .80  
 95 79-058 -6012-4899 .81 .78 .83 .87 .75 .64 .63 .68 .76 .70 .78 .81 .76 .75 .85 .88 .89 .87 .81 .86  
 104 79-085 -5377-4989 .67 .66 .74 .63 .66 .84 .52 .52  
 119 79-136 -6245-5448 .77 .75 .71 .75 .69 .54 .58 .70 .80 .80  
**125 80-101 -5821-5075 .78 .66 .70 .77 .73 .79 .69 .58 .75 .74 .68 .85 .91 .74 .69 .74 .70 .79 .75 .74**  
 127 80-103 -5361-4491 .81 .82 .83 .77 .77 .82 .78  
 133 80-110 -6022-4238 .74 .65 .78 .84 .64 .60 .78 .78 .77 .80 .80 .77 .79 .84 .83 .81 .80 .76 .72 .79  
 136 80-116 -5685-2822 .75 .68 .73 .81 .80 .81 .84 .79 .75 .83 .77 .81 .93 .84 .83 .72 .83 .92 .82 .76  
 184 93-031 -6133-5618 .62 .70 .74  
 234 XX-001 -6056-3998 .73 .61 .75 .84 .84 .64 .52 .60 .63 .65 .66 .69 .71 .57 .54 .67 .74 .73 .67 .68  
 235 XX-002 -5323-3562 .69 .80 .81 .76 .65  
 Av segment correlation .70 .67 .75 .78 .69 .64 .65 .70 .77 .74 .67 .72 .78 .72 .75 .74 .76 .81 .74  
 .73

**-5200 to -5051**

33 67-035 -5553-4714 .69 .67 .75 .75 .64  
 38 69-202 -6223-5096 .87 .81 .78 .73  
 40 70-020 -5460-4708 .79 .71 .75 .82 .79  
 44 70-046 -6066-5008 .44 .49 .51 .49 .73  
 46 70-176 -6045-5039 .53 .53 .62 .74 .83  
 50 71-061 -5419-4931 .79 .74 .79 .90 .75  
 53 71-161 -5340-4819 .63 .65 .77 .82 .59  
 55 72-104 -5722-4960 .75 .67 .71 .77 .78  
 56 72-175 -6059-5080 .90 .91 .90 .91  
 61 77-104 -5747-4487 .87 .79 .82 .86 .80

|                               |        |            |     |     |     |     |     |
|-------------------------------|--------|------------|-----|-----|-----|-----|-----|
| 72                            | 77-151 | -5230-4748 | .79 | .71 | .71 | .78 | .63 |
| 74                            | 77-158 | -5199-4495 | .62 | .65 | .67 | .67 | .59 |
| 76                            | 77-162 | -5673-4821 | .82 | .85 | .79 | .67 | .61 |
| 89                            | 78-075 | -5598-4575 | .78 | .81 | .82 | .66 | .53 |
| 93                            | 79-050 | -5198-4891 | .64 | .81 | .81 | .67 | .74 |
| 94                            | 79-057 | -5169-4706 |     | .80 | .80 | .86 | .85 |
| 95                            | 79-058 | -6012-4899 | .83 | .75 | .81 | .85 | .77 |
| 98                            | 79-075 | -5095-4163 |     |     |     |     | .83 |
| 101                           | 79-082 | -5077-4733 |     |     |     |     | .84 |
| 104                           | 79-085 | -5377-4989 | .62 | .65 | .76 | .80 | .72 |
| 107                           | 79-091 | -5102-4306 |     |     |     | .64 | .64 |
| 125                           | 80-101 | -5821-5075 | .78 | .83 | .88 | .91 | .92 |
| 127                           | 80-103 | -5361-4491 | .76 | .70 | .75 | .82 | .83 |
| 133                           | 80-110 | -6022-4238 | .78 | .81 | .84 | .84 | .70 |
| <b>-5200 to -5051 (cont.)</b> |        |            |     |     |     |     |     |
| 136                           | 80-116 | -5685-2822 | .80 | .78 | .79 | .86 | .85 |
| 234                           | XX-001 | -6056-3998 | .61 | .57 | .60 | .55 | .66 |
| 235                           | XX-002 | -5323-3562 | .70 | .74 | .77 | .87 | .84 |
| Av segment correlation        |        |            | .73 | .73 | .76 | .77 | .74 |

Samples from the MWK chronology show strong cross-matching with other independently developed bristlecone pine chronologies (across 5750 years) from Sheep Mountain and Indian Garden. These chronologies are available at: <https://catalog.data.gov/dataset/international-tree-ring-data-bank-itrd> and further details are provided in Salzer and Hughes, 2007<sup>7</sup>, 2010<sup>8</sup>, Salzer et al 2009<sup>9</sup>, 2014<sup>10</sup>, Kipfmueller, 2010<sup>11</sup>.

Mean correlation between SHP and MWK of 115  
100-year intervals overlapped every 50 years for 5750 years

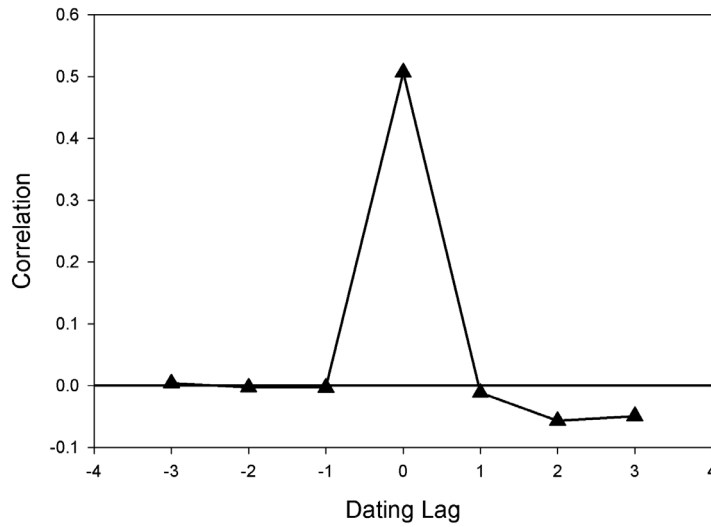

Tree-ring width measurements of the dissected subsamples used in this study are provided below:

| Tree ID     | Astronomical<br>calendar (AD/BC<br>with 0) | BCE  | BP   | 80-101B<br>SubSample1<br>Ringwidth | 80-101B<br>SubSample2<br>Ringwidth |
|-------------|--------------------------------------------|------|------|------------------------------------|------------------------------------|
| MWK-80-101B | -5270                                      | 5271 | 7220 | 0.408                              | 0.599                              |
| MWK-80-101B | -5269                                      | 5270 | 7219 | 0.464                              | 0.62                               |
| MWK-80-101B | -5268                                      | 5269 | 7218 | 0.644                              | 0.831                              |
| MWK-80-101B | -5267                                      | 5268 | 7217 | 0.634                              | 0.83                               |
| MWK-80-101B | -5266                                      | 5267 | 7216 | 0.526                              | 0.656                              |
| MWK-80-101B | -5265                                      | 5266 | 7215 | 0.704                              | 0.909                              |
| MWK-80-101B | -5264                                      | 5265 | 7214 | 0.502                              | 0.698                              |
| MWK-80-101B | -5263                                      | 5264 | 7213 | 0.76                               | 0.999                              |
| MWK-80-101B | -5262                                      | 5263 | 7212 | 0.628                              | 0.811                              |
| MWK-80-101B | -5261                                      | 5262 | 7211 | 0.47                               | 0.58                               |
| MWK-80-101B | -5260                                      | 5261 | 7210 | 0.61                               | 0.94                               |
| MWK-80-101B | -5259                                      | 5260 | 7209 | 0.29                               | 0.47                               |
| MWK-80-101B | -5258                                      | 5259 | 7208 | 0.342                              | 0.501                              |
| MWK-80-101B | -5257                                      | 5258 | 7207 | 0.506                              | 0.643                              |
| MWK-80-101B | -5256                                      | 5257 | 7206 | 0.414                              | 0.471                              |
| MWK-80-101B | -5255                                      | 5256 | 7205 | 0.434                              | 0.52                               |
| MWK-80-101B | -5254                                      | 5255 | 7204 | 0.644                              | 0.856                              |

|             |       |      |      |       |       |
|-------------|-------|------|------|-------|-------|
| MWK-80-101B | -5253 | 5254 | 7203 | 0.232 | 0.496 |
| MWK-80-101B | -5252 | 5253 | 7202 | 0.498 | 0.687 |
| MWK-80-101B | -5251 | 5252 | 7201 | 0.278 | 0.399 |
| MWK-80-101B | -5250 | 5251 | 7200 | 0.338 | 0.489 |

For the 7176 BCE event, sample MWK85-051 from the non-calendar dated portion of the Methuselah Walk bristlecone pine master chronology was selected. This sample derives from a single *Pinus longaeva* D.K.Bailey tree which grew at the Methuselah Walk site (MWK) in the White Mountains of California in the western USA. The remnant tree was preserved in a dry, high altitude mountain environment. The full tree sampled had 474 rings with no pith, bark or waney edge present. This tree is not part of the existing MWK master chronology but was placed in time by a possible dendrochronological match backed by limited, coarse resolution radiocarbon dating<sup>12</sup> (Salzer *et al.* 2019). The sample was selected with the aim of testing the possible placement and using annual <sup>14</sup>C to firmly connect this sample with the MWK master tree-ring chronology, extending this sequence securely back in time. Following dissection of the first sub-sample at annual resolution it became clear that an adjustment of around 40 years was required to this dating in order to detect the 7176 BCE event. A second sampling was carried out, with the floating astronomical calendar (AD/BC with 0) years adjusted to be 40 years older. The annual <sup>14</sup>C analysis of the second subsample detected the 7176 BCE event, indicating a further 1-year adjustment was necessary to align the floating bristlecone pine series with the other, annual <sup>14</sup>C measurements on calendar dated trees. This extends the continuous sequence for MWK over 10,398 years.

The dissected years and associated sub-sample ringwidths are provided in the table below:

|                                                                                                                         |                                                                                                               | Dating B                                   |                                                                                                                |                                                                                                               |                                            |
|-------------------------------------------------------------------------------------------------------------------------|---------------------------------------------------------------------------------------------------------------|--------------------------------------------|----------------------------------------------------------------------------------------------------------------|---------------------------------------------------------------------------------------------------------------|--------------------------------------------|
| Dating A<br>(AD/BC with 0)<br>NOT CALENDAR<br>SECURE –<br>floating<br>placement:<br>course<br>resolution<br>radiocarbon | Dating A<br>(BP) NOT<br>CALENDAR<br>SECURE –<br>floating<br>placement:<br>course<br>resolution<br>radiocarbon | MWK-85-<br>051B<br>Subsample1<br>Ringwidth | (AD/BC with<br>0) NOT<br>CALENDAR<br>SECURE –<br>floating<br>placement:<br>higher<br>resolution<br>radiocarbon | Dating B (BP)<br>NOT<br>CALENDAR<br>SECURE –<br>floating<br>placement:<br>higher<br>resolution<br>radiocarbon | MWK-85-<br>051B<br>SubSample2<br>Ringwidth |
| -7186                                                                                                                   | 9136                                                                                                          | 402                                        | -7160                                                                                                          | 9150                                                                                                          | 0.682                                      |
| -7185                                                                                                                   | 9135                                                                                                          | 260                                        | -7159                                                                                                          | 9149                                                                                                          | 1.036                                      |
| -7184                                                                                                                   | 9134                                                                                                          | 490                                        | -7158                                                                                                          | 9148                                                                                                          | 0.684                                      |
| -7183                                                                                                                   | 9133                                                                                                          | 602                                        | -7157                                                                                                          | 9147                                                                                                          | 0.472                                      |
| -7182                                                                                                                   | 9132                                                                                                          | 656                                        | -7156                                                                                                          | 9146                                                                                                          | 0.614                                      |
| -7181                                                                                                                   | 9131                                                                                                          | 596                                        | -7155                                                                                                          | 9145                                                                                                          | 0.5                                        |
| -7180                                                                                                                   | 9130                                                                                                          | 720                                        | -7154                                                                                                          | 9144                                                                                                          | 0.194                                      |

|       |      |     |       |      |       |
|-------|------|-----|-------|------|-------|
| -7179 | 9129 | 760 | -7153 | 9143 | 0.066 |
| -7178 | 9128 | 640 | -7152 | 9142 | 0     |
| -7177 | 9127 | 592 | -7151 | 9141 | 0.25  |
| -7176 | 9126 | 496 | -7150 | 9140 | 0.186 |
| -7175 | 9125 | 574 | -7149 | 9139 | 0.398 |
| -7174 | 9124 | 388 | -7148 | 9138 | 0.646 |
| -7173 | 9123 | 796 | -7147 | 9137 | 0.498 |
| -7172 | 9122 | 996 | -7146 | 9136 | 0.54  |
| -7171 | 9121 | 878 | -7145 | 9135 | 1.476 |
| -7170 | 9120 | 690 | -7144 | 9134 | 0.408 |
| -7169 | 9119 | 556 | -7143 | 9133 | 0.32  |
| -7168 | 9118 | 804 | -7142 | 9132 | 0.218 |
| -7167 | 9117 | 630 | -7141 | 9131 | 0.526 |
| -7166 | 9116 | 540 | -7140 | 9130 | 0.898 |
| -7165 | 9115 | 808 | -7139 | 9129 | 0.61  |
| -7164 | 9114 | 732 | -7138 | 9128 | 1     |
| -7163 | 9113 | 924 | -7137 | 9127 | 1.308 |
| -7162 | 9112 | 338 | -7136 | 9126 | 0.85  |
| -7161 | 9111 | 446 | -7135 | 9125 | 0.346 |
| -7160 | 9110 | 884 | -7134 | 9124 | 0.448 |
|       |      |     | -7133 | 9123 | 0.658 |
|       |      |     | -7132 | 9122 | 0.92  |
|       |      |     | -7131 | 9121 | 1.118 |
|       |      |     | -7130 | 9120 | 1.48  |
|       |      |     | -7129 | 9119 | 0.894 |
|       |      |     | -7128 | 9118 | 0.49  |
|       |      |     | -7127 | 9117 | 0.738 |
|       |      |     | -7126 | 9116 | 0.78  |
|       |      |     | -7125 | 9115 | 0.884 |
|       |      |     | -7124 | 9114 | 0.974 |
|       |      |     | -7123 | 9113 | 1.018 |

|       |      |       |
|-------|------|-------|
| -7122 | 9112 | 0.484 |
| -7121 | 9111 | 0.572 |
| -7120 | 9110 | 0.482 |
| -7119 | 9109 | 0.45  |
| -7118 | 9108 | 0.402 |
| -7117 | 9107 | 0.602 |
| -7116 | 9106 | 0.336 |
| -7115 | 9105 | 0.58  |
| -7114 | 9104 | 0.818 |
| -7113 | 9103 | 0.688 |
| -7112 | 9102 | 0.632 |
| -7111 | 9101 | 0.722 |
| -7110 | 9100 | 0.762 |

The sub-samples were cut to be c. 5 mm thick relative to the transverse section. The upper and lower surface were lightly sanded, preserving original pin-holes, but removing any surface contamination and excess resins which come up to the sample surface over time. The upper, lower and radial surfaces were clearly marked with the pin-holes and measurements re-checked prior to dissection. Dissection was carried out using the two versions of the flating astronomical calendar (AD/BC with 0) scale and carried out at times 20 magnification using a binocular microscope and steel dissecting blade. The same blade was used to remove any residual contamination possibilities (pinholes, any residual cells from the previously dissected year of interest) prior to sampling each separate year of interest. Samples were dissected working from youngest to oldest and packed in pre-marked foil packets.

For both time periods covered by this study, the tree-rings were very narrow and the wood highly resinous making dissection a challenge.

#### *Siberian Larch*

Tree rings for radiocarbon analysis of Siberian Larch (*Larix sibirica* Ledeb.) were taken from the sample L4756. This sample was collected on 14 August 2019 from a subfossil stem buried in the alluvial deposits of the Tanlova River (Fig. S1.5) in the southern part of the Yamal Peninsula, which is located in the continuous permafrost zone. Most of subfossil wood found in the area grew near the recent polar tree line. Sample L4756 was found 15 km north of the northernmost currently growing trees. The coordinates of the finding location are 67.75 N 70.06 E, 30 m above sea level.

The sample L4756 contained 302 annual rings, which were dated using a 8768 years long Yamal master chronology<sup>13</sup> (Fig. S1.6).

Sample L4756, like all the others subfossil samples collected in Yamal, is archived at the Institute of Plant and Animal Ecology, Ural Branch of the Russian Academy of Sciences, Ekaterinburg, Russia.

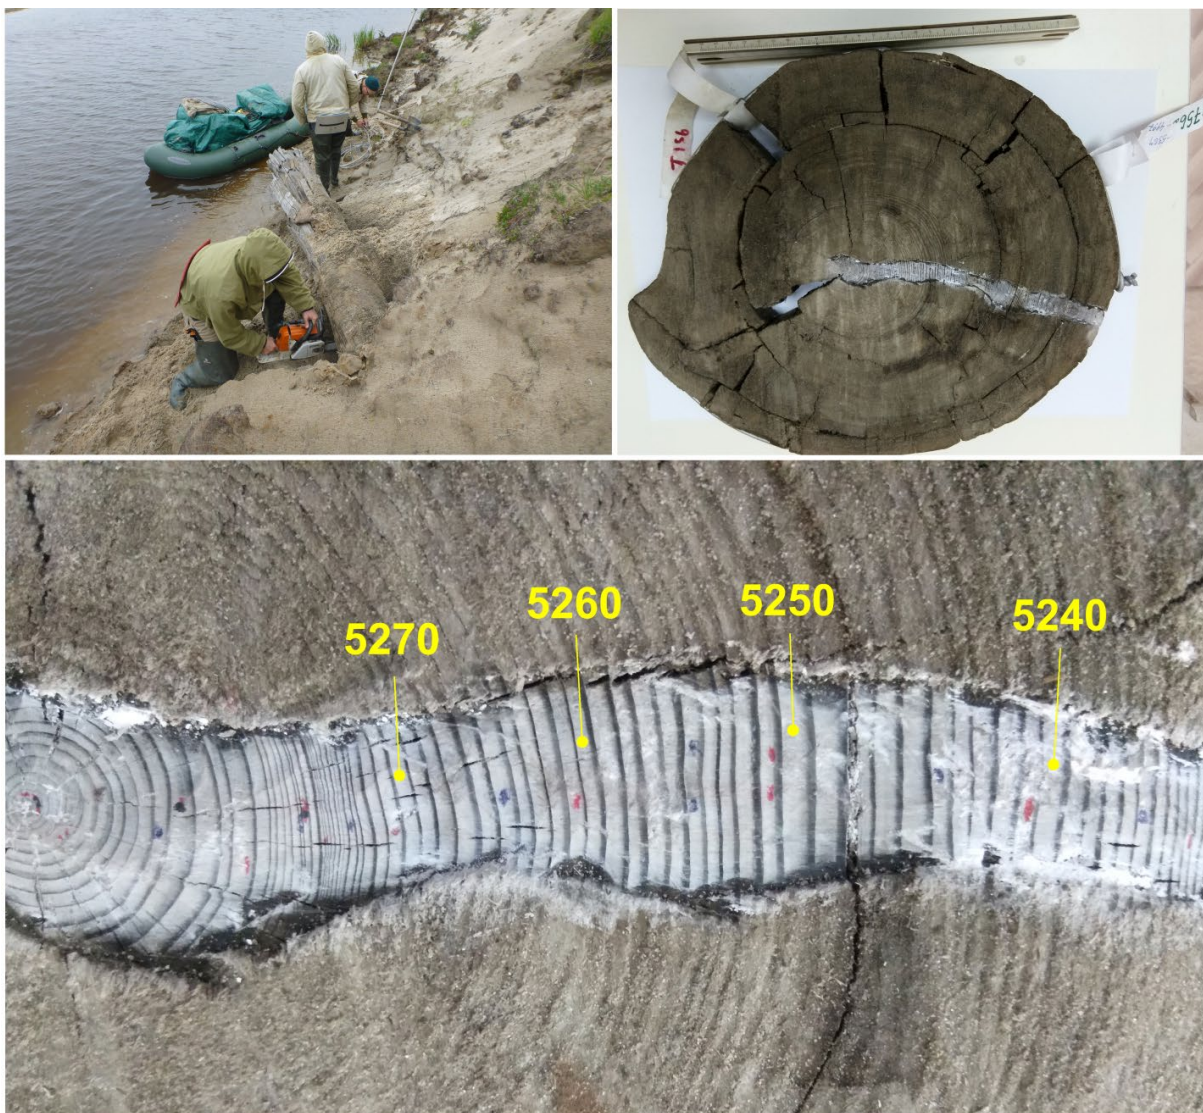

Figure S1.5. Siberian larch used in this work: a) collecting a sample L4756 (Photo by P.Fonti); b) sample L4756; c) tree rings used for analysis (5272-5247 BCE).



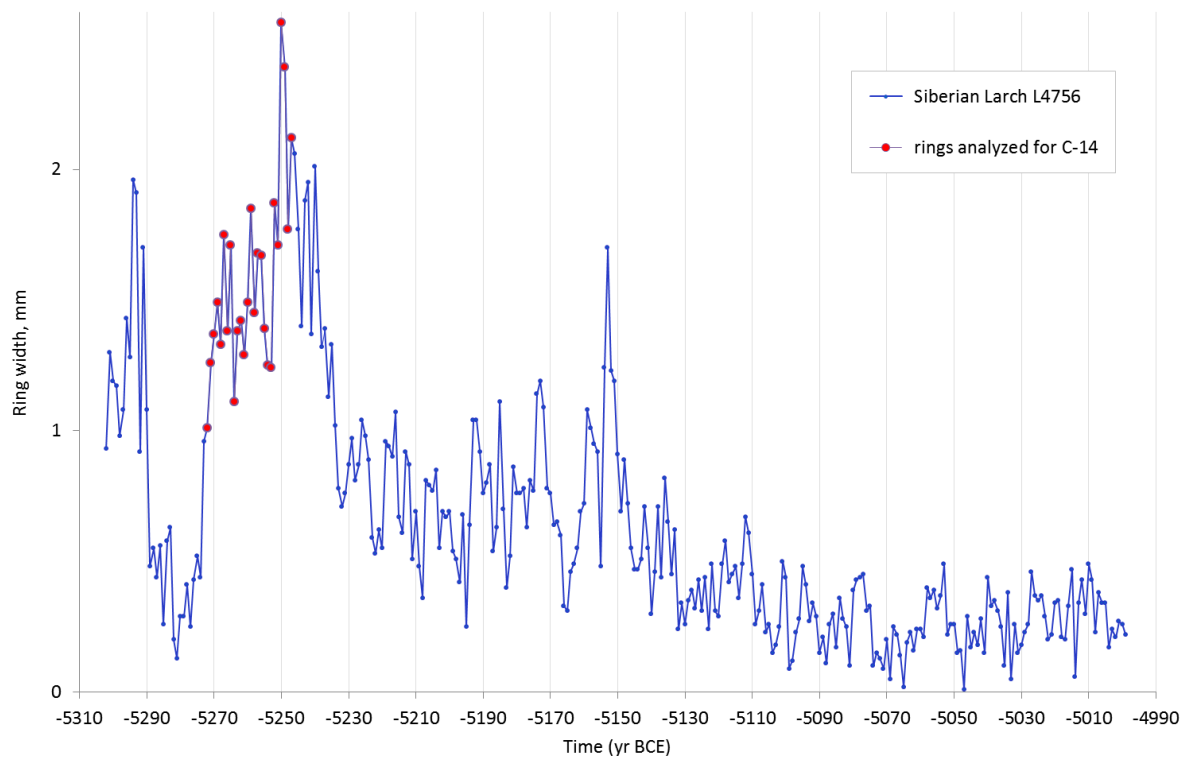

Figure S1.6. Ring width measurements of sample L4756

#### *Dendrochronological dating of two larch samples from the Swiss Alps (ua-1601, tsc-182)*

Two larch (*Larix decidua* Mill.) specimens sampled at Alpine glacier forefields were selected for the yearly resolved  $^{14}\text{C}$  analyses. The main selection criterion was comparatively wide tree rings.

##### *tsc-182 Alpine Larch*

Specimen tsc-182 was collected from a larch log which was uncovered by the retreating Tschierwa glacier (46°23' N, 9°52' E), Switzerland, and subsequently displaced by the glacier creek. Field work for sampling was carried out on 15.9.2007. On the specimen tsc-182, 12 (partial) radii were measured with a resolution of 1/1000 mm and subsequently averaged into a 431-year tree-ring width series. The last 54 rings of this series are slightly compressed due to the former covering by the glacier. According to the crossdating (Tab. S1.7) to the Eastern Alpine Conifer Chronology<sup>14</sup> (Fig. S1.7) the 431-year long series (Tab. S1.8) yielded the calendar dating 5337 – 4907 BCE (historical timescale, without year 0).

##### *ua-1601 Alpine Larch*

This larch specimen comes from a detrital log found on the forefield of the Unteraar glacier (46°34' N, 8°12' E), Switzerland. The log was sampled in 2016. Four (partial) radii were measured on the specimen with a resolution of 1/1000 mm and subsequently averaged to a 119-year tree-ring width series. The outermost 18 rings of specimen ua-1601 are slightly compressed. This series was crossdated (for statistics see Tab. S1.7) to the Eastern Alpine Conifer Chronology<sup>14,15</sup> (Fig. S1.7) and returned the calendar dates 7242 – 7124 BCE (Tab. S1.8) (historical timescale, without year 0).

Both specimens are stored in the tree-ring sample archive at the Department of Geography, Universität Innsbruck, Austria. The dissection of the wood samples into single tree-rings for the yearly resolved  $^{14}\text{C}$  measurements was carried out under a microscope using razor blades.

**Table S1.7** Crossdating statistics for the comparison of the two Alpine larch series tsc-182 and ua-1601 with the Eastern Alpine Conifer Chronology (EACC, Nicolussi et al. 2009, 2015). Calculations were carried out by using the program WinTSAP. Overlap: no. of years; Glk.: Gleichläufigkeit; Sign. Glk.: pointer interval Gleichläufigkeit; t-value<sub>BP</sub> and t-value<sub>H</sub>: t-values after Baillie and Pilcher as well as Hollstein; dating: historical timescale, without year 0.

| Sample  | Reference chronology | Overlap [n] | Glk. [%] | Sign. Glk. [%] | t-value <sub>BP</sub> | t-value <sub>H</sub> | Dating [year BCE] |
|---------|----------------------|-------------|----------|----------------|-----------------------|----------------------|-------------------|
| tsc-182 | EACC                 | 431         | 63       | 66             | 7.5                   | 7.4                  | 5337 - 4907       |
| ua-1601 | EACC                 | 119         | 73       | 76             | 5.8                   | 7.0                  | 7242 - 7124       |

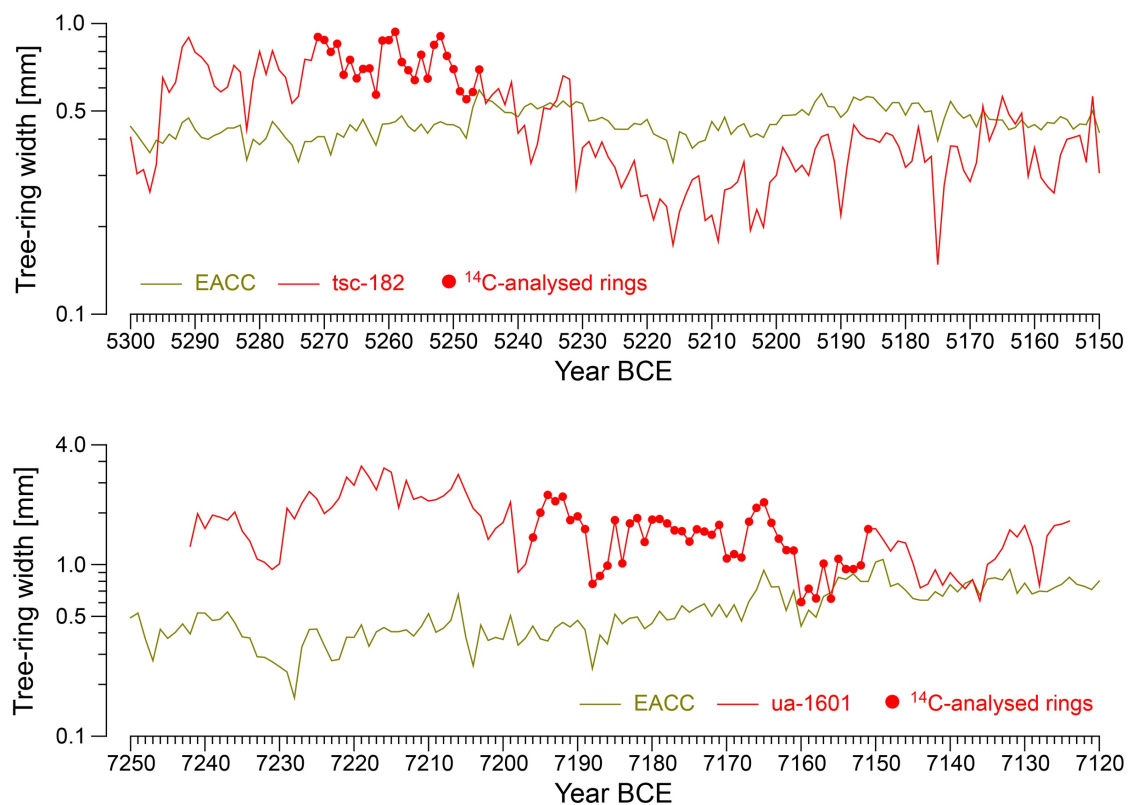

**Figure S1.7** Comparison of the tree-ring width series of the Alpine larch specimens' tsc-182 (upper) and ua-1601 (lower) with the Eastern Alpine Conifer Chronology. The series are given on a logarithmic scale, the tree rings used for single-year <sup>14</sup>C analyses are indicated. For ua-1601, a 150-year long section of the series around the <sup>14</sup>C-analysed samples is shown.

**Tab. S1.8** Tree-ring width series of the two Alpine larch specimen tsc-182 and ua-1601 which provided single-ring samples for radiocarbon analyses (used format: Heidelberg).

HEADER:  
 KeyCode=tsc-182  
 Location=Tschierva glacier  
 Species=Larix decidua  
 DataFormat=Tree  
 SeriesType=Mean curve  
 Unit=1/1000 mm  
 Pith=P  
 WaldKante=---  
 Length=431

DateBegin=-5337

DateEnd=-4907

Dated=Dated

DATA:Single

86 160 92 71 71 81 48 98 60 61  
35 48 40 36 39 80 101 65 53 84  
133 132 224 172 214 237 152 151 134 164  
213 214 257 170 156 285 374 406 304 314  
263 327 651 579 628 830 895 796 765 719  
608 582 604 717 681 431 639 800 669 805  
691 653 531 561 753 746 899 877 799 852  
666 750 647 698 701 569 874 876 936 737  
690 639 781 646 844 904 774 697 585 549  
581 695 530 568 597 525 628 419 446 330  
384 512 507 545 661 643 272 374 393 347  
391 346 320 272 301 337 254 257 211 249  
235 173 225 258 290 299 210 219 178 267  
272 285 334 194 229 199 284 300 375 343  
309 325 300 370 408 416 335 219 325 448  
416 402 400 390 420 412 376 320 336 440  
333 349 148 277 379 377 312 286 332 519  
395 448 560 487 451 491 298 374 295 275  
261 353 399 405 412 334 562 307 326 417  
456 536 428 330 269 128 288 163 215 192  
194 234 245 262 330 283 217 250 307 310  
282 254 341 547 353 547 427 291 218 252  
327 332 381 367 409 252 301 397 356 339  
274 326 474 382 450 389 551 469 363 372  
396 304 240 261 226 180 219 259 241 283  
223 274 212 363 274 324 285 299 266 218  
202 283 329 347 431 368 353 376 494 493  
398 321 368 313 317 358 388 464 402 367  
392 367 322 260 227 231 199 186 178 189  
165 196 264 326 360 359 430 529 690 419  
291 309 484 559 373 411 420 520 401 492  
458 559 556 636 508 459 380 419 577 384  
298 420 591 367 401 330 339 273 257 322  
272 320 503 482 284 358 288 244 285 281  
269 143 142 320 306 227 190 168 124 89  
155 199 202 313 247 299 313 345 364 390  
358 344 379 348 377 221 176 332 291 308  
306 376 479 402 278 304 228 248 197 240  
273 334 264 188 222 164 236 227 231 219  
262 276 280 240 253 311 321 238 301 269  
265 269 251 231 237 262 262 269 286 366  
294 278 264 221 271 242 215 120 160 179  
178 229 159 112 190 156 188 194 156 140  
151

HEADER:

KeyCode=ua-1601

Location=Unteraar glacier

Species=Larix decidua

DataFormat=Tree  
 SeriesType=Mean curve  
 Unit=1/1000 mm  
 Pith=-  
 WaldKante=---  
 Length=119  
 DateBegin=-7242  
 DateEnd=-7124  
 Dated=Dated  
 DATA:Single  
 1281 1979 1623 1946 1894 1815 2029 1571 1373 1079  
 1032 938 1011 2134 1850 2278 2672 2420 1986 2152  
 2443 3239 2903 3754 3251 2733 3659 3457 2152 3090  
 2403 2494 2351 2393 2515 2750 3355 2643 2126 1916  
 1404 1625 1761 2313 902 1003 1443 2011 2553 2345  
 2493 1821 1913 1614 773 861 986 1817 1018 1741  
 1868 1358 1831 1848 1740 1587 1569 1364 1610 1560  
 1495 1708 1087 1152 1101 1782 2145 2309 1754 1418  
 1216 1210 606 725 636 1016 633 1081 943 943  
 991 1613 1619 1403 1200 1372 1337 1022 732 770  
 931 758 899 800 725 819 615 1004 1074 1246  
 1595 1449 1692 1277 754 1469 1692 1726 1796

### Supplementary Figures

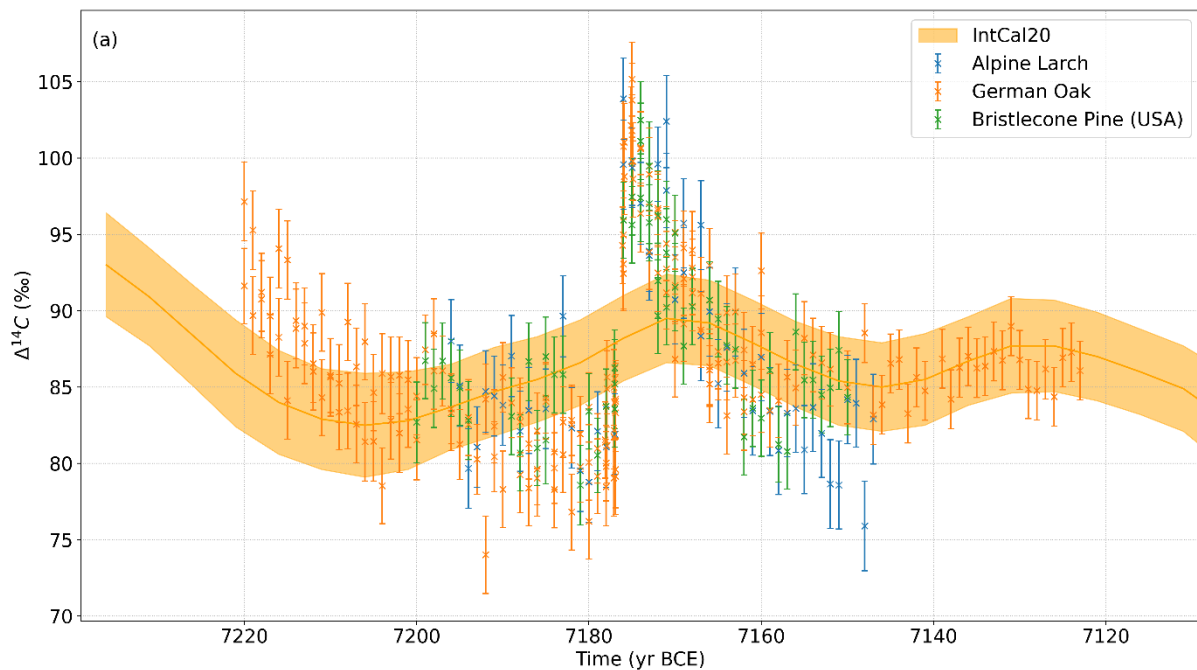

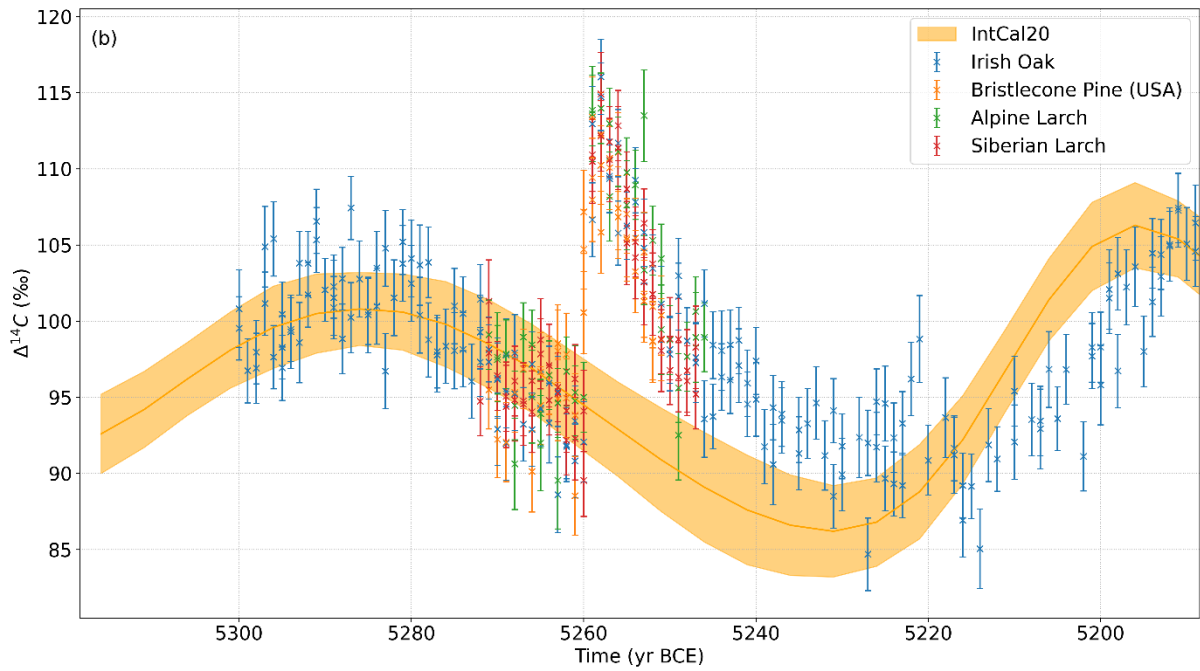

**Supplementary Fig. 1 All Measurement results of the 2 new events.**  $^{14}\text{C}$  measurements with  $1\text{-}\sigma$  errors reported as  $\Delta^{14}\text{C}$  of the two newly found events (7176 BCE (a), 5259 BCE (b)) in all different trees compared to the IntCal20 calibration curve<sup>16</sup> (orange band). The Irish Oak was independently repeated by two different labs (ETH-Zurich, Bristol).

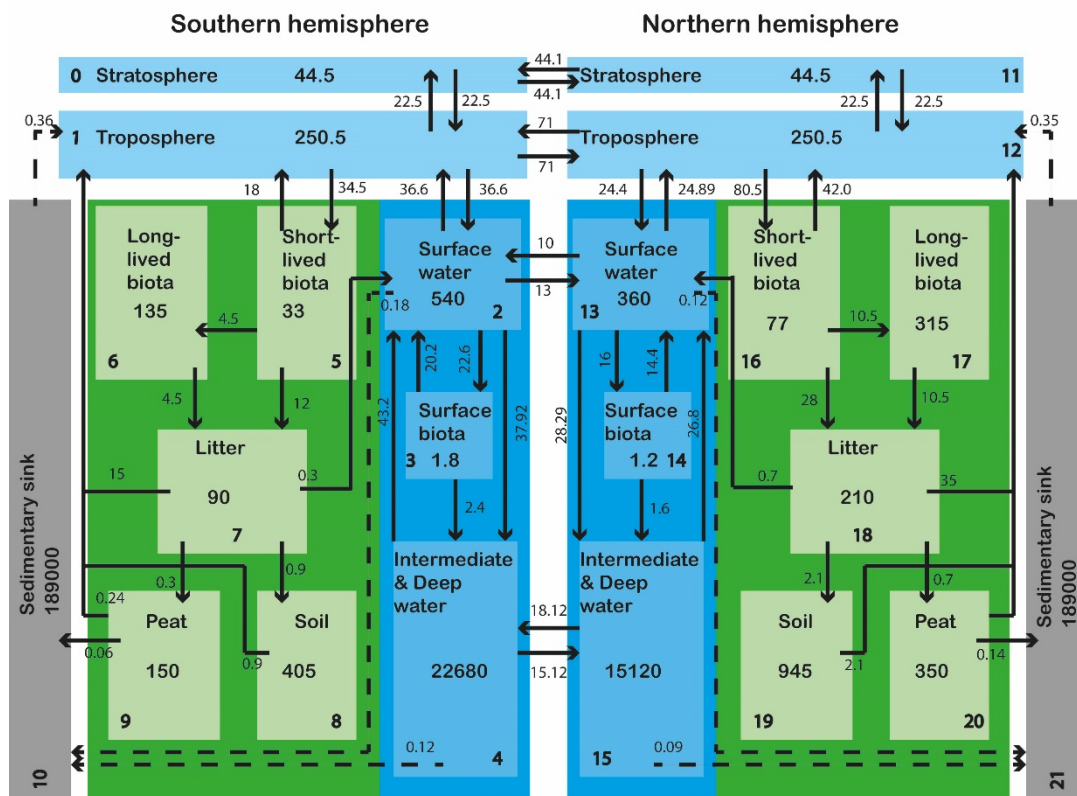

**Supplementary Fig. 2 Carbon box model used to reconstruct  $^{14}\text{C}$  production.** The carbon fluxes between boxes and their carbon contents are given in Gt/yr and Gt.

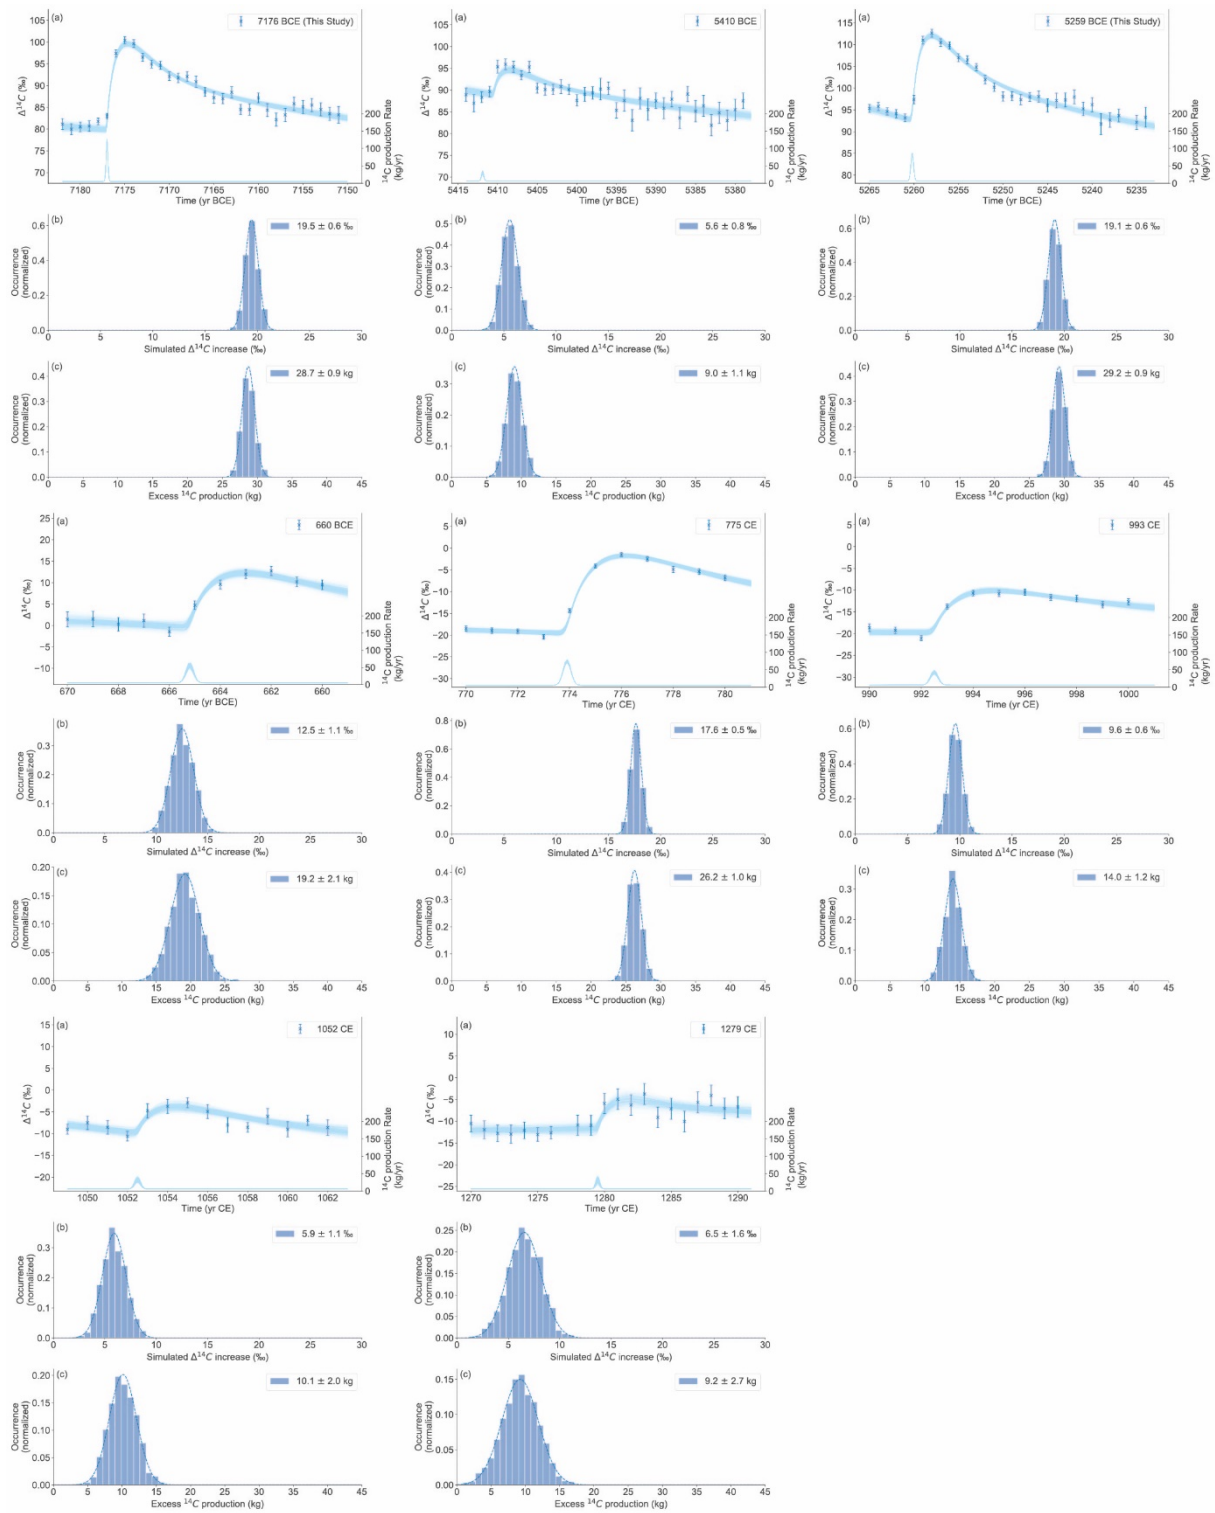

**Supplementary Fig. 3 Evaluation of all known  $^{14}\text{C}$  events.** (a) Mean data of known  $^{14}\text{C}$  events with  $1\text{-}\sigma$  errors and result of 1000 Simulations. The fitted Gaussian shaped production spikes for all simulations are also shown. (b) Distribution of the simulated  $\Delta^{14}\text{C}$  increases (blue bars) with a Gaussian fit (dashed line). (c) Distribution of excess  $^{14}\text{C}$  production (blue bars) with Gaussian fit (dashed line). Data Sources: 5410 BCE: Miyake et al.<sup>17</sup>, 660 BCE: Sakurai et al.<sup>18</sup>, 775 CE and 993 CE: Büntgen et al.<sup>19</sup>, 1052 CE and 1279 CE: Brehm et al.<sup>20</sup>.

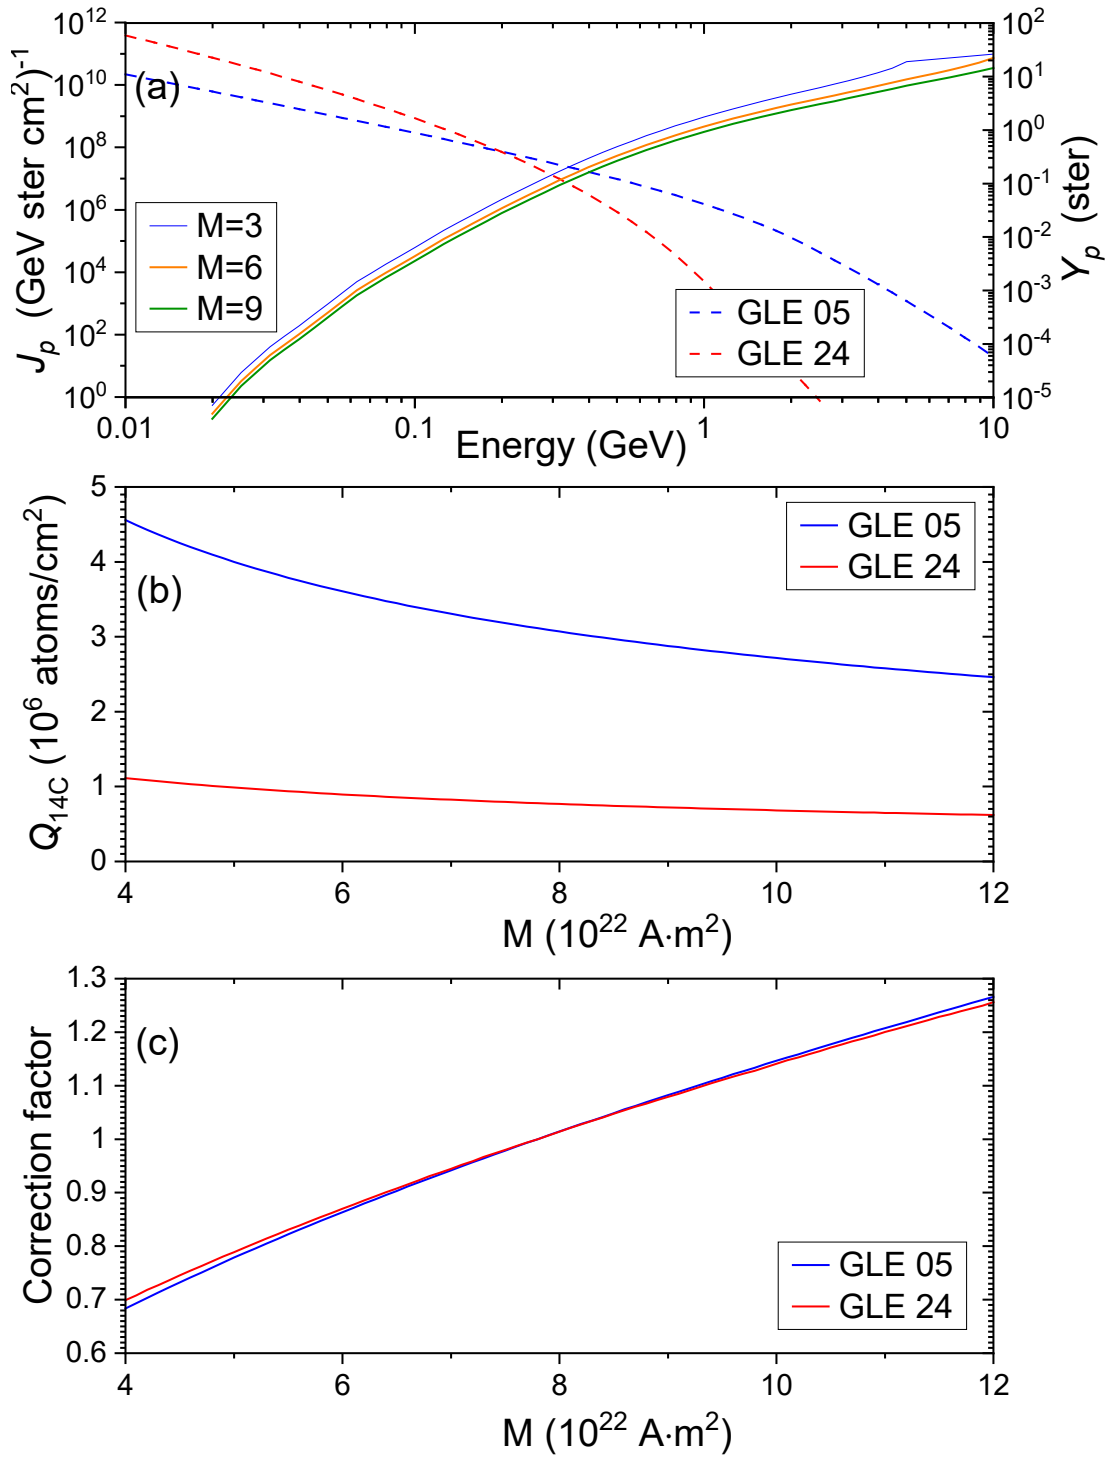

**Supplementary Fig. 4** Production of  $^{14}\text{C}$  by SEP events for different values of VADM: (a) Global yield functions ( $Y_p$ , right-hand-side axis) of  $^{14}\text{C}$  by protons for three values of VADM (3x, 6x and 9x $10^{22}$  A m $^2$  as blue, orange and green solid lines, respectively); as well as spectral omnidirectional fluences ( $J(E)$ , left-hand-side axis) of SEPs for two bounding cases, the softest and hardest-spectrum known events of 23-Feb-1956 (GLE 05, blue dashed line) and 04-Aug-1972 (GLE 24, red dashed line). (b) Calculated globally-averaged  $^{14}\text{C}$  production  $Q_{14\text{C}}$  during the two SEP events as a function of the geomagnetic field VADM. (c) Correction factor  $Q(M_0)/Q(M)$  of the  $^{14}\text{C}$  production at the VADM value of  $M$  to that for a modern geomagnetic field ( $M_0=7.8 \cdot 10^{22}$  A m $^2$ ).

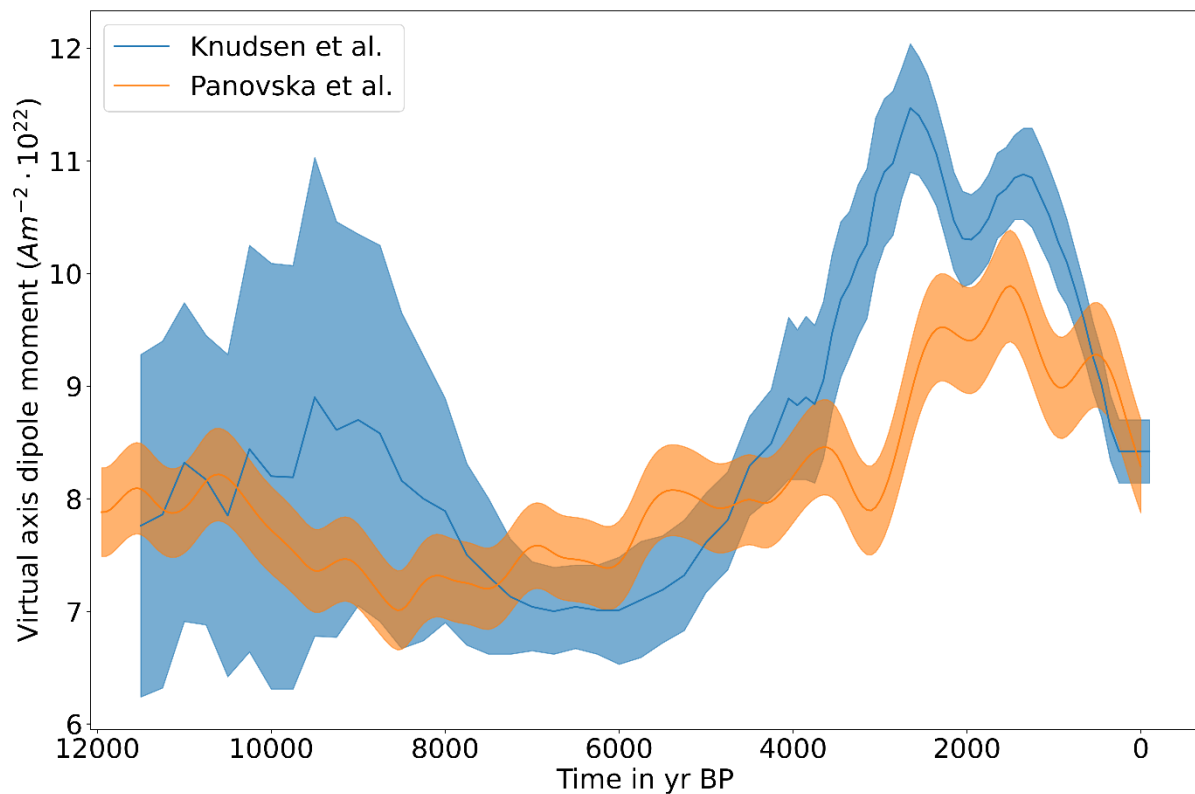

**Supplementary Fig. 5 Comparison of two geomagnetic field reconstructions.** Two geomagnetic field reconstructions by Knudsen et al.<sup>21</sup> (blue) and Panovska et al.<sup>22</sup> (orange) over the last 12000 years including 1- $\sigma$  uncertainty ranges.

## References

- 1 Baillie, M. G. L. *Tree-ring dating and archaeology*. (London : Croom Helm, 1982).
- 2 Munro, M. A. R. An Improved Algorithm for Crossdating Tree-Ring Series. (1984).
- 3 Ferguson, C. W. A 7104-Year Annual Tree-Ring Chronology for Bristlecone Pine, *Pinus Aristata*, from the White Mountains, California. *Tree-ring Bulletin* (1969).
- 4 Stokes, M. A. & Smiley, T. L. *An Introduction to Tree-ring Dating*. (University of Arizona Press, 1996).
- 5 Holmes, R. Computer-Assisted Quality Control in Tree-Ring Dating and Measurement. *Tree-ring Bulletin* (1983).
- 6 LaMarche Jr., V. C. & Harlan, T. P. Accuracy of tree ring dating of bristlecone pine for calibration of the radiocarbon time scale. *Journal of Geophysical Research (1896-1977)* **78**, 8849-8858, doi:10.1029/JC078i036p08849 (1973).
- 7 Salzer, M. W. & Hughes, M. K. Bristlecone pine tree rings and volcanic eruptions over the last 5000 yr. *Quaternary Res* **67**, 57-68, doi:10.1016/j.yqres.2006.07.004 (2007).
- 8 Salzer, M. W. & Hughes, M. K. in *Advances in Global Change Research Advances in Global Change Research* 469-482 (Springer International Publishing, 2010).
- 9 Salzer, M., Hughes, M., Bunn, A. & Kipfmueller, K. Recent unprecedented tree-ring growth in bristlecone pine at the highest elevations and possible causes. *Proceedings of the National Academy of Sciences of the United States of America* **106**, 20348-20353, doi:10.1073/pnas.0903029106 (2009).
- 10 Salzer, M. W., Bunn, A. G., Graham, N. E. & Hughes, M. K. Five millennia of paleotemperature from tree-rings in the Great Basin, USA. *Climate Dynamics* **42**, 1517-1526, doi:10.1007/s00382-013-1911-9 (2014).



- 11 Kipfmüller, K. F. & Salzer, M. W. Linear trend and climate response of five-needle pines in the western United States related to treeline proximity. *Canadian Journal of Forest Research* **40**, 134-142, doi:10.1139/X09-187 (2010).
- 12 Salzer, M. W., Pearson, C. L. & Baisan, C. H. Dating the Methuselah Walk Bristlecone Pine Floating Chronologies. *Tree-Ring Research* **75**, 61-66, doi:10.3959/1536-1098-75.1.61 (2019).
- 13 Hantemirov, R. M. *et al.* An 8768-year Yamal Tree-ring Chronology as a Tool for Paleocological Reconstructions. *Russian Journal of Ecology* **52**, 419-427, doi:10.1134/S1067413621050088 (2021).
- 14 Nicolussi, K. *et al.* A 9111 year long conifer tree-ring chronology for the European Alps: a base for environmental and climatic investigations. *The Holocene* **19**, 909-920, doi:10.1177/0959683609336565 (2009).
- 15 Nicolussi, K., Weber, G., Patzelt, G. & Thurner, A. A question of time: extension of the Eastern Alpine Conifer Chronology back to 10071 b2k. *GFZ Potsdam, Scientific Technical Report STR15, Potsdam*, 69-73 (2015).
- 16 Reimer, P. J. *et al.* The IntCal20 Northern Hemisphere Radiocarbon Age Calibration Curve (0–55 cal kBP). *Radiocarbon* **62**, 725-757, doi:10.1017/RDC.2020.41 (2020).
- 17 Miyake, F. *et al.* A Single-Year Cosmic Ray Event at 5410 BCE Registered in <sup>14</sup>C of Tree Rings. *Geophys Res Lett* **48**, e2021GL093419, doi:10.1029/2021GL093419 (2021).
- 18 Sakurai, H. *et al.* Prolonged production of <sup>14</sup>C during the ~660 BCE solar proton event from Japanese tree rings. *Scientific Reports* **10**, 660, doi:10.1038/s41598-019-57273-2 (2020).
- 19 Büntgen, U. *et al.* Tree rings reveal globally coherent signature of cosmogenic radiocarbon events in 774 and 993 CE. *Nature Communications* **9**, doi:10.1038/s41467-018-06036-0 (2018).
- 20 Brehm, N. *et al.* Eleven-year solar cycles over the last millennium revealed by radiocarbon in tree rings. *Nature Geoscience* **14**, 10-15, doi:10.1038/s41561-020-00674-0 (2021).
- 21 Knudsen, M. F. *et al.* Variations in the geomagnetic dipole moment during the Holocene and the past 50 kyr. *Earth and Planetary Science Letters* **272**, 319-329, doi:10.1016/j.epsl.2008.04.048 (2008).
- 22 Panovska, S., Constable, C. G. & Korte, M. Extending Global Continuous Geomagnetic Field Reconstructions on Timescales Beyond Human Civilization. *Geochemistry, Geophysics, Geosystems* **19**, 4757-4772, doi:10.1029/2018GC007966 (2018).
